# Supplementary material for: Ultrasound Doppler as an Imaging Modality for Selection of Murine 4T1 Breast Tumors for Combination Radiofrequency Hyperthermia and Chemotherapy
Source: PubMed Central journal article supplement — Transl Oncol. 2018 May 12;11(4):864–72. doi: 10.1016/j.tranon.2018.04.010 (PMC6019683; doi:10.1016/j.tranon.2018.04.010), 2018-05-12
Supplement: mmc1.pdf [file mmc1.pdf]

## SUPPORTING INFORMATION

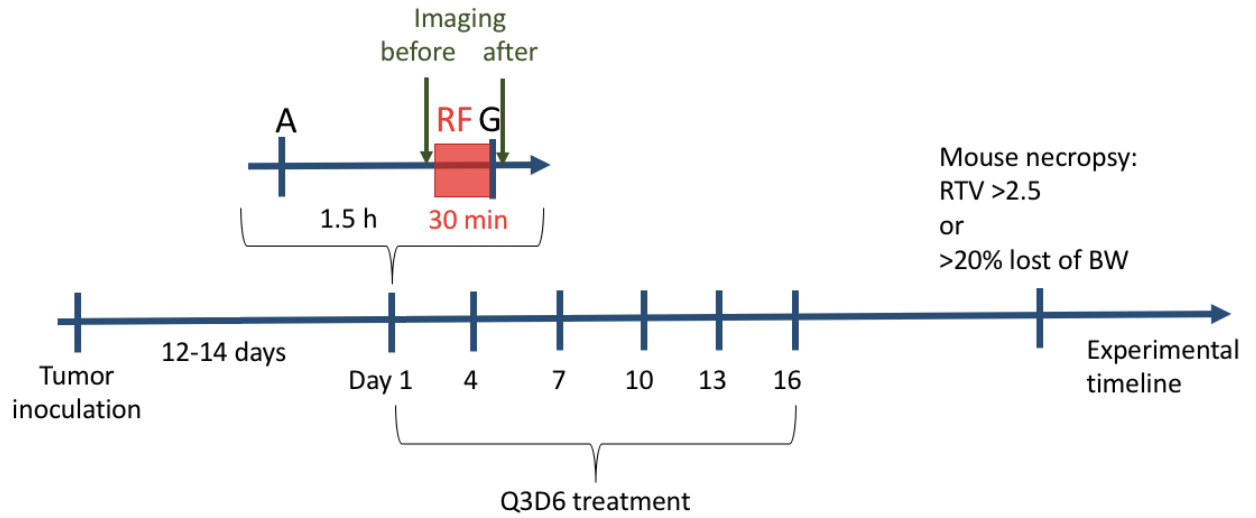

**S1:** Treatment scheme and associated timeline in regards to tumor inoculation, chemotherapy administration, RF exposure, ultrasound imaging, and necropsy.

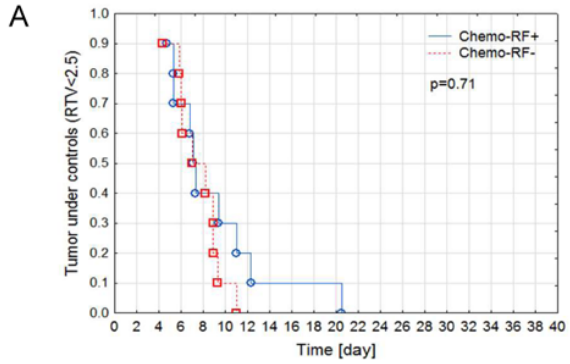

Control (saline injections)  
 Total number of valid  
 observation: 20 (uncensored 20)  
 Z=0.378  
 P=0.705

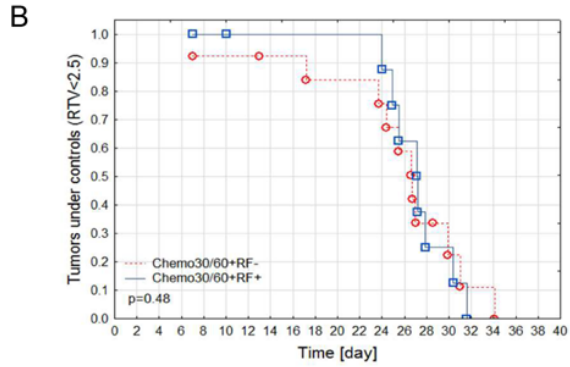

A/G 30/60 mg/kg  
 Total number of valid  
 observation: 26 (uncensored 19)  
 Z=-0.710  
 P=0.477

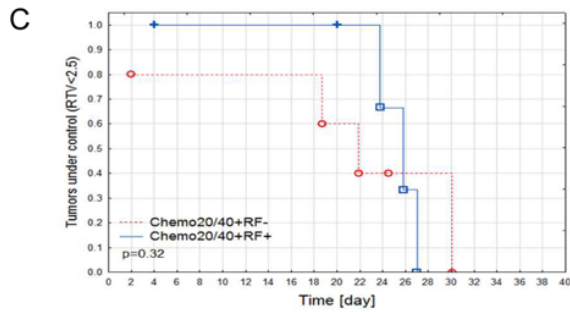

A/G 20/40 mg/kg  
 Total number of valid  
 observation: 10 (uncensored 7)  
 Z=-0.996  
 P=0.3191

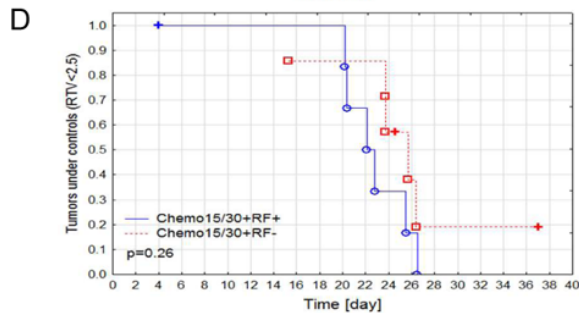

A/G 15/60 mg/kg  
 Total number of valid  
 observation: 10 (uncensored 7)  
 Z=-1.132  
 P=0.257

**S2:** Kaplan-Meier survival analysis for no-heat groups (RF-) and RF heated (RF+) for all used chemotherapy dosages: (A) control – saline treated mice, (B) A/G 30/60 mg/kg, (C) A/G 20/40 mg/kg, (D) A/G 15/60 mg/kg.
